# Supplementary material for: Non-linear dimensionality reduction on extracellular waveforms reveals cell type diversity in premotor cortex
Source: eLife journal article supplement (doi:10.7554/elife.67490), 2021-08-06
Supplement: supp [file elife-67490-supp-v3.zip]

Archive with 11 entries (11 files):
- elife_poa_e67490_Figure_2_figure_supplement_1.pdf
- elife_poa_e67490_Figure_3_figure_supplement_1.pdf
- elife_poa_e67490_Figure_3_figure_supplement_2.pdf
- elife_poa_e67490_Figure_3_figure_supplement_3.pdf
- elife_poa_e67490_Figure_4_figure_supplement_1.pdf
- elife_poa_e67490_Figure_4_figure_supplement_2.pdf
- elife_poa_e67490_Figure_5_figure_supplement_1.pdf
- elife_poa_e67490_Figure_6_figure_supplement_1.pdf
- elife_poa_e67490_Figure_8_figure_supplement_1.pdf
- elife_poa_e67490_Transparent_Reporting_File.docx
- elife_poa_e67490_Source_code_1.zip
