# Supplementary figures and images for: Non-linear dimensionality reduction on extracellular waveforms reveals cell type diversity in premotor cortex
Source: eLife journal article supplement (doi:10.7554/elife.67490), 2021-08-06

**A**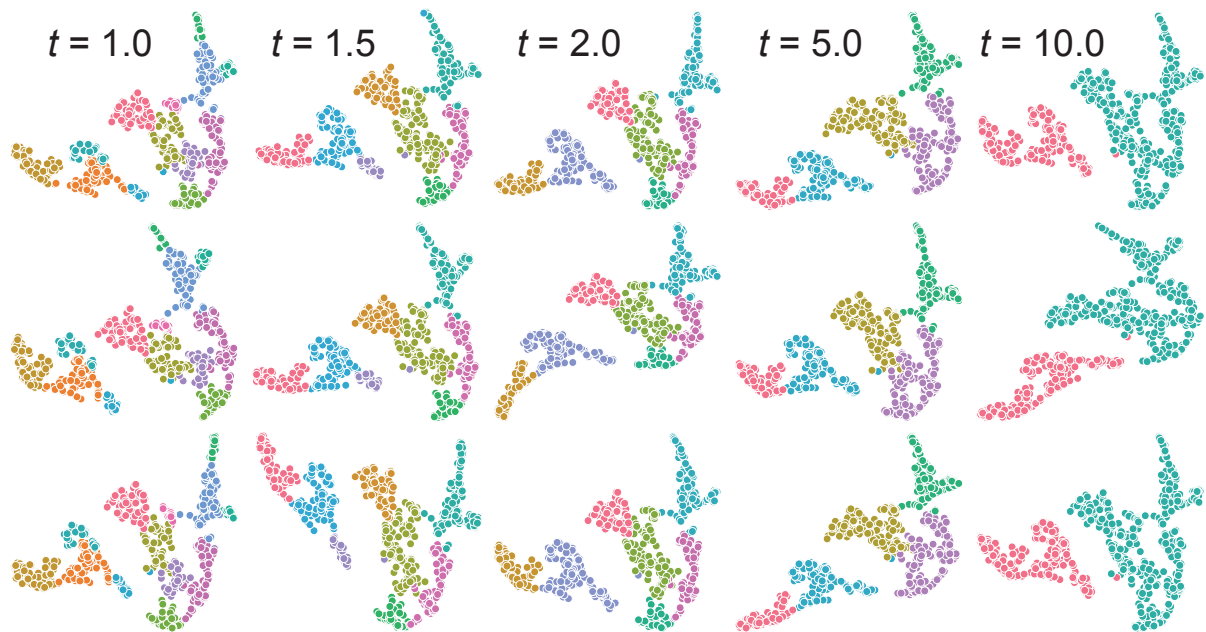**B**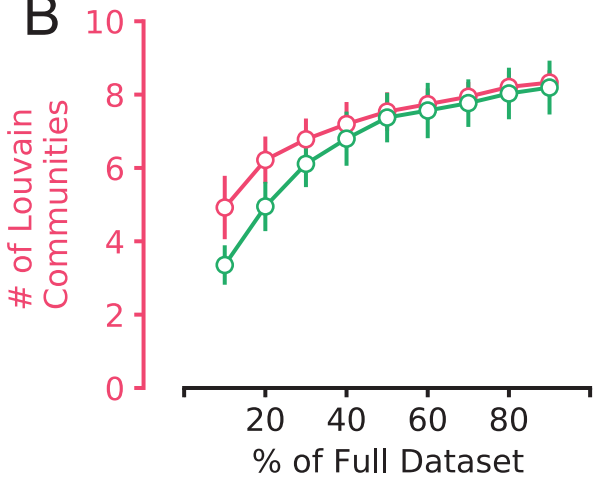**C**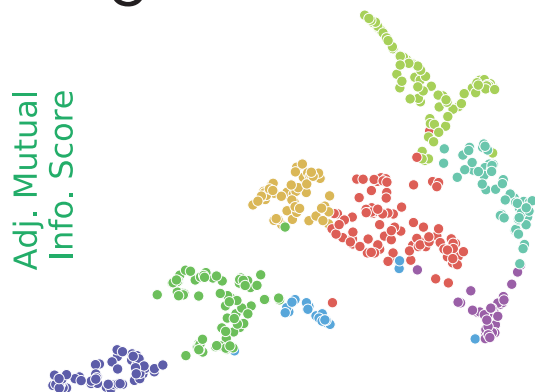

Supplement: supp [file elife-67490-supp-v1.zip]

A

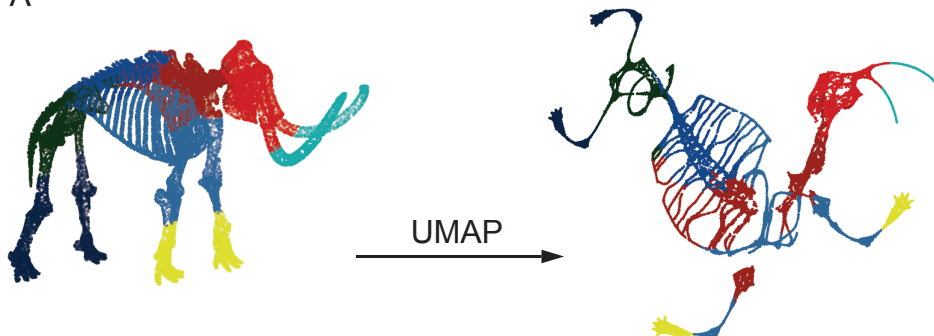

B

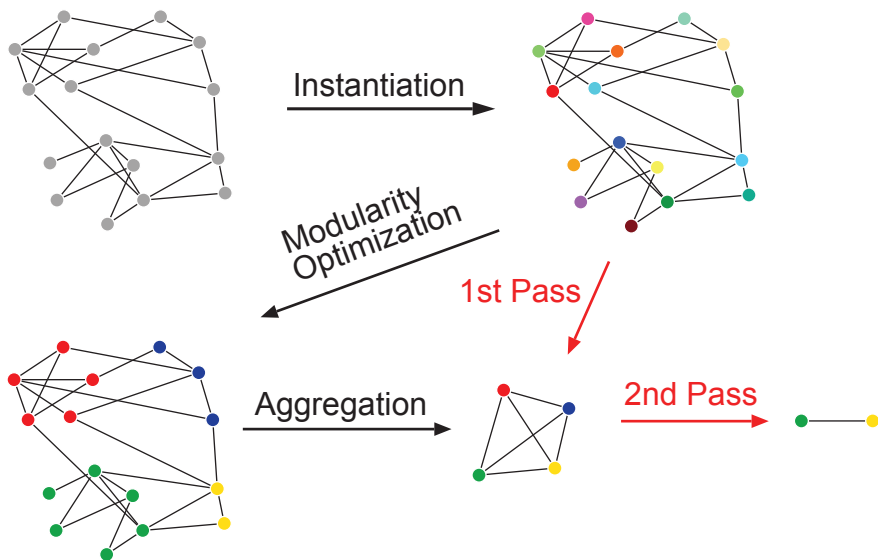

Supplement: supp [file elife-67490-supp-v1.zip]

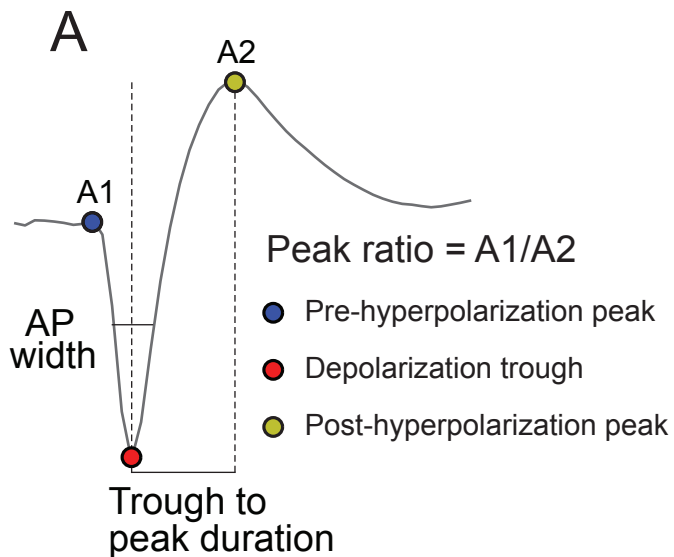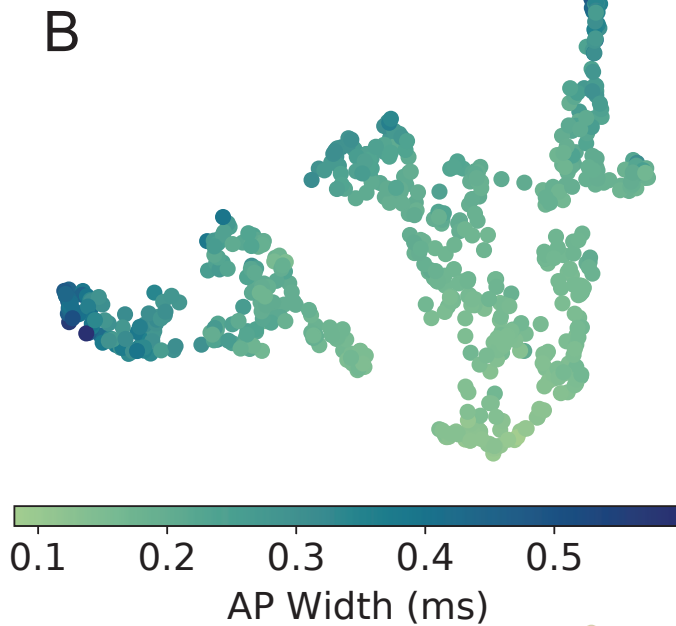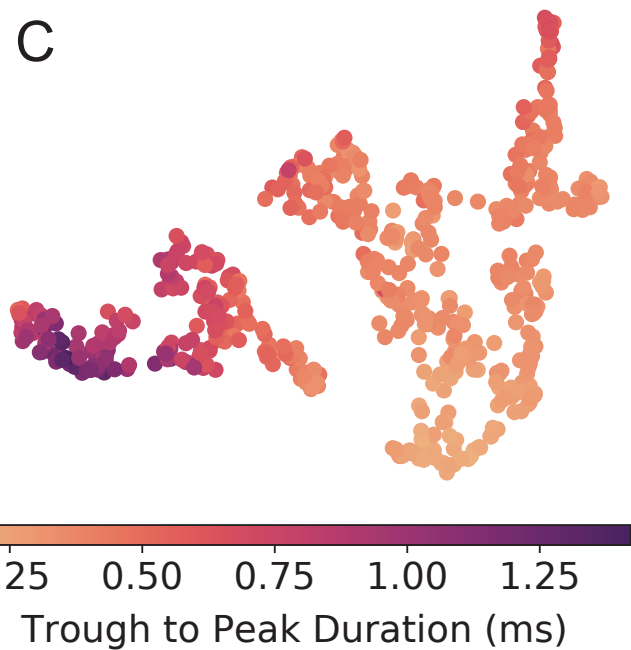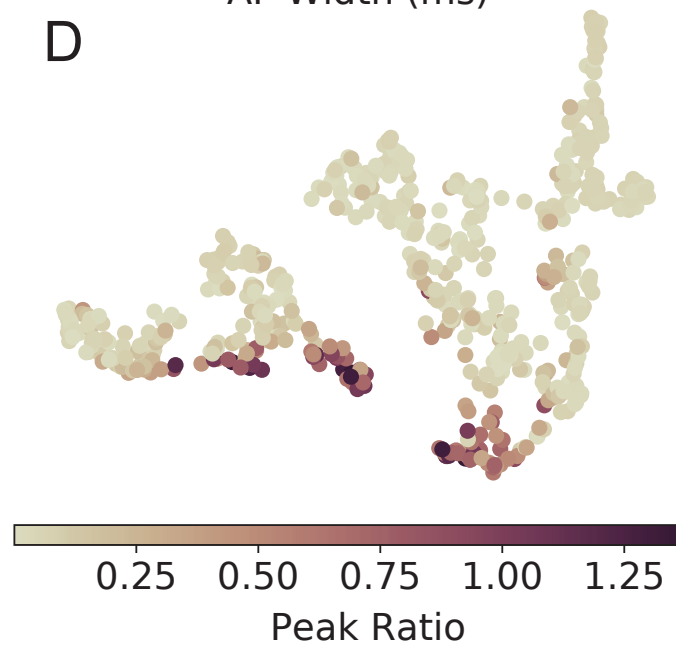

Supplement: supp [file elife-67490-supp-v1.zip]

A

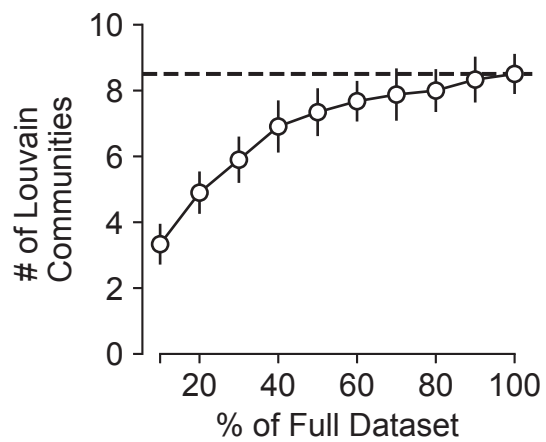

B

-1 to +1 trough to peak

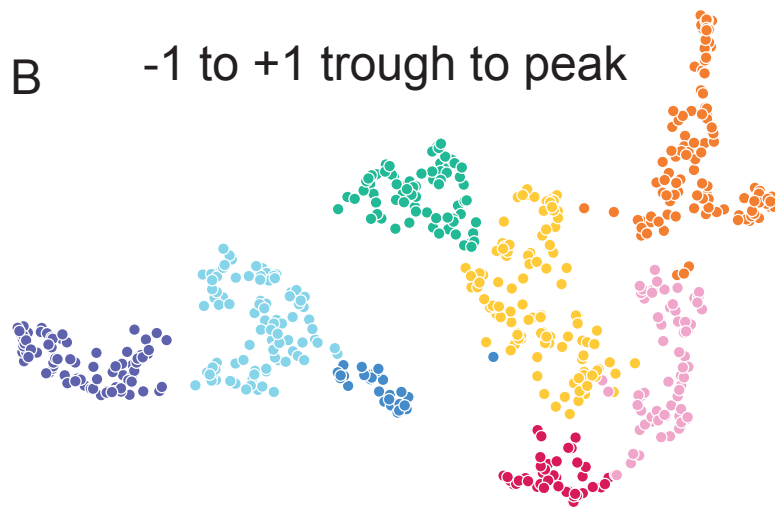

D

normalized to trough

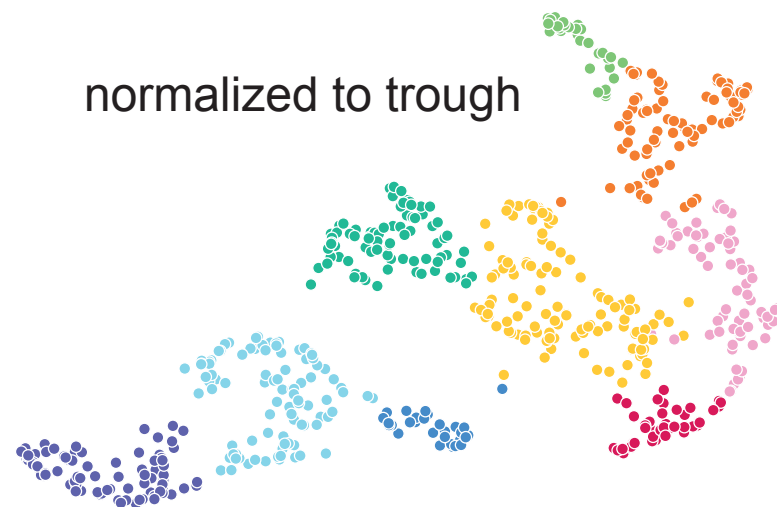

C

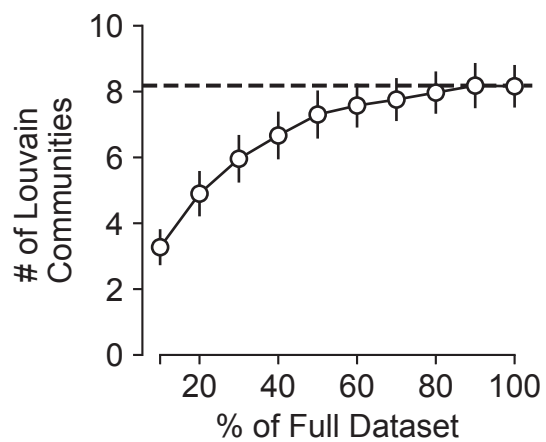

E

un-normalized

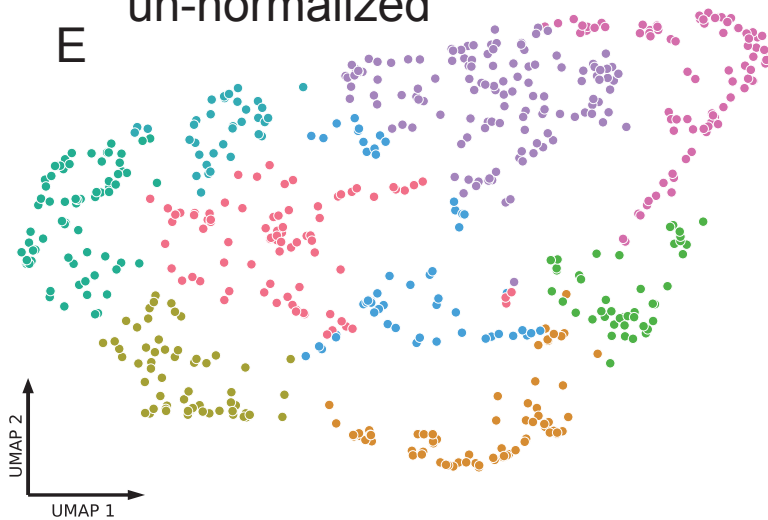

F

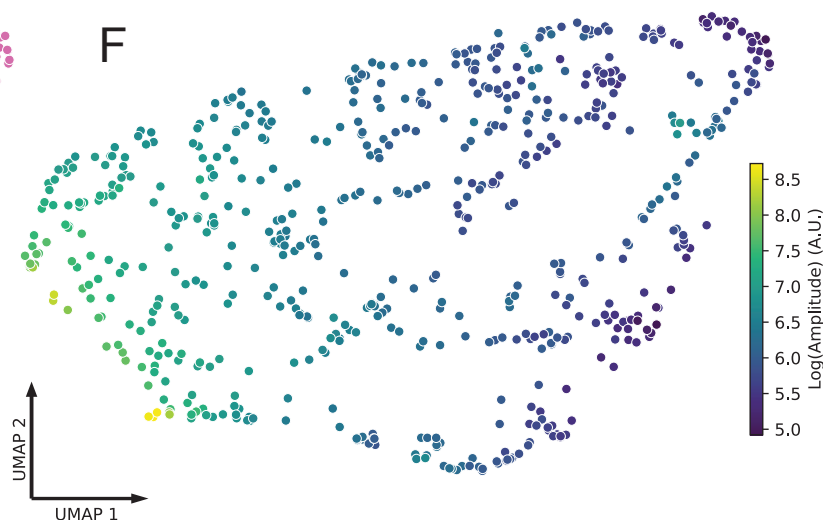

Supplement: supp [file elife-67490-supp-v1.zip]

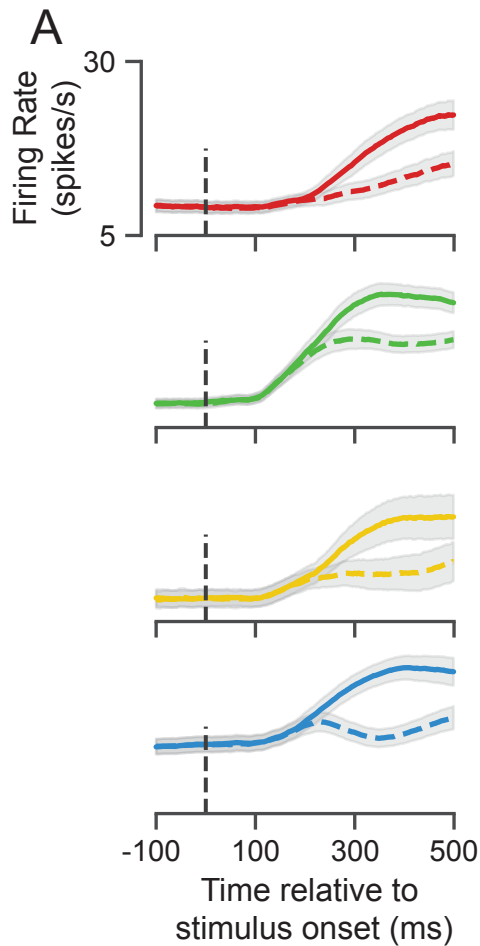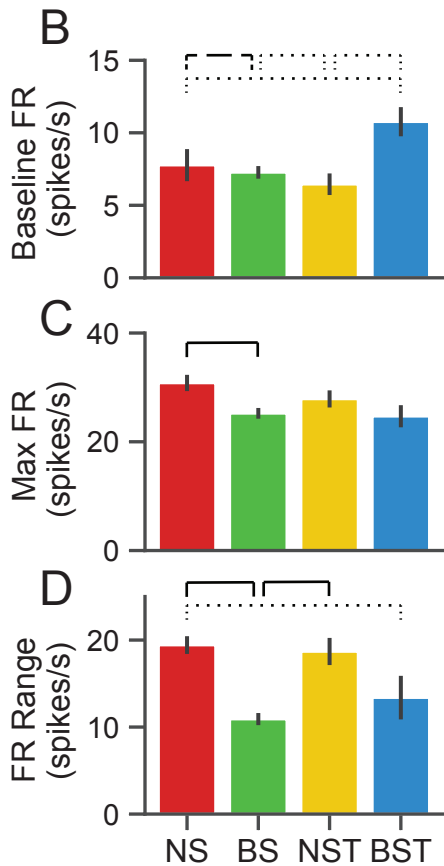

Supplement: supp [file elife-67490-supp-v1.zip]

**A**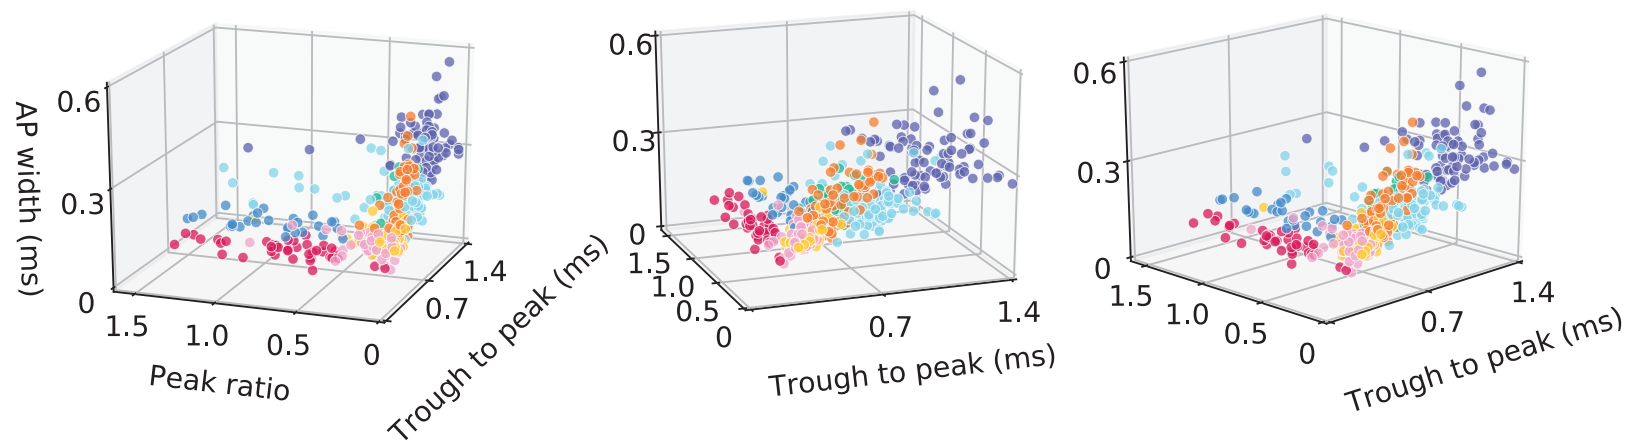**B**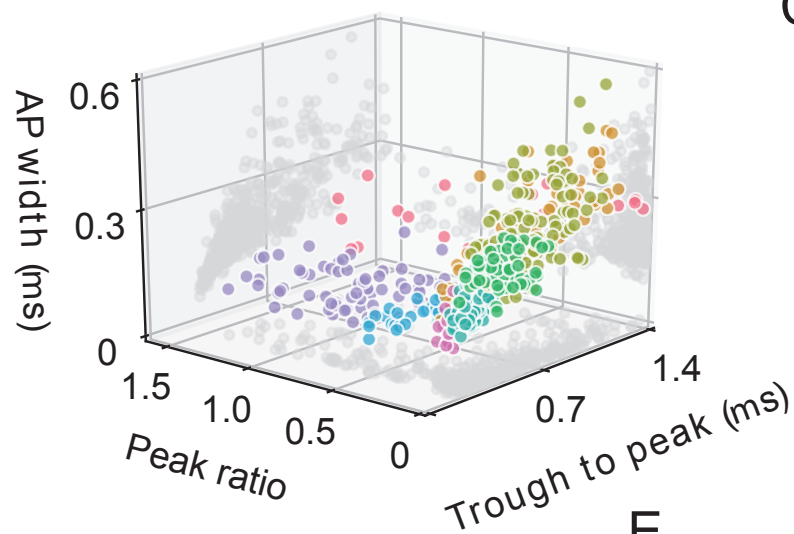**C**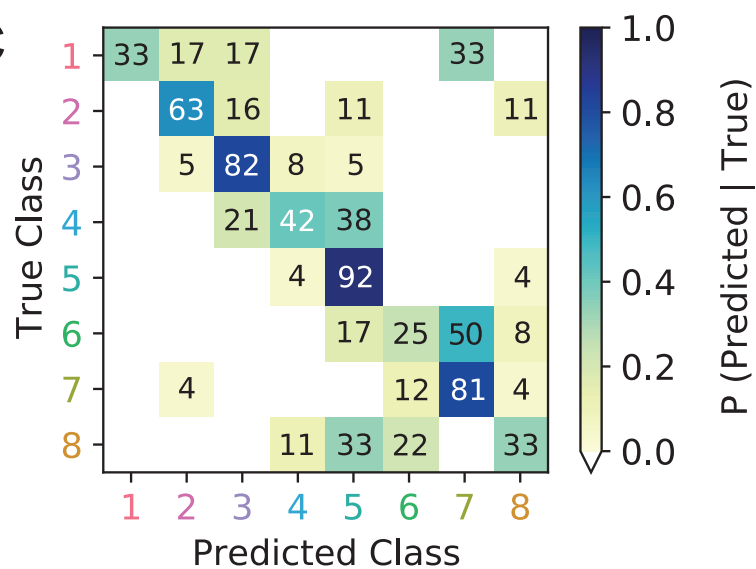**D**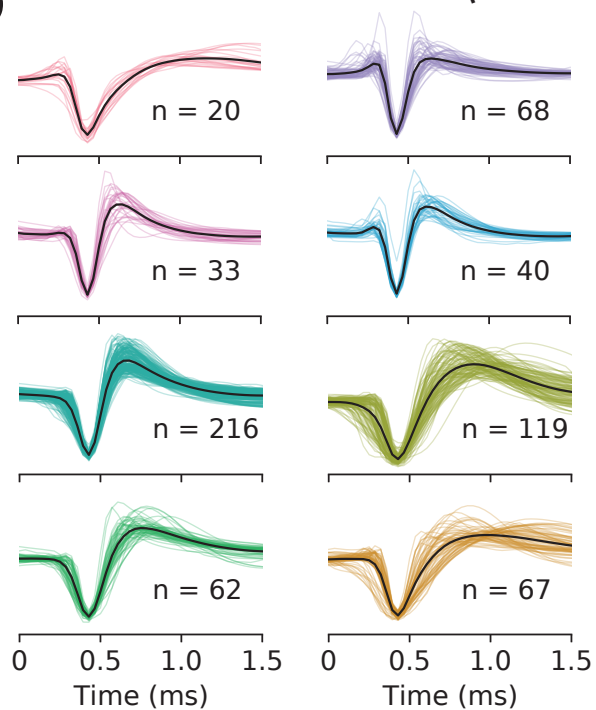**E**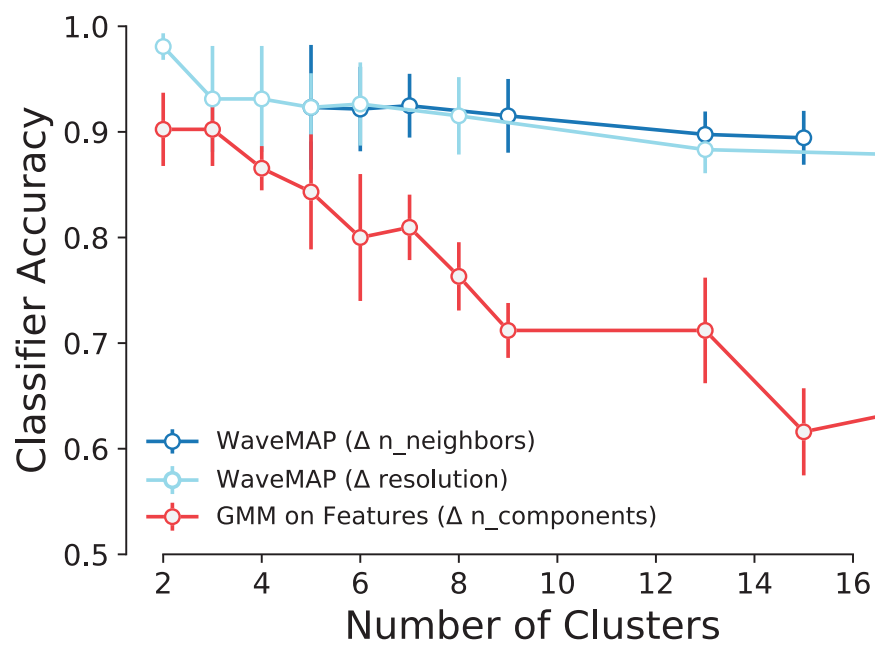

Supplement: supp [file elife-67490-supp-v1.zip]

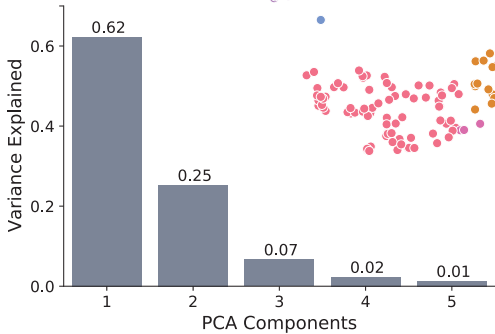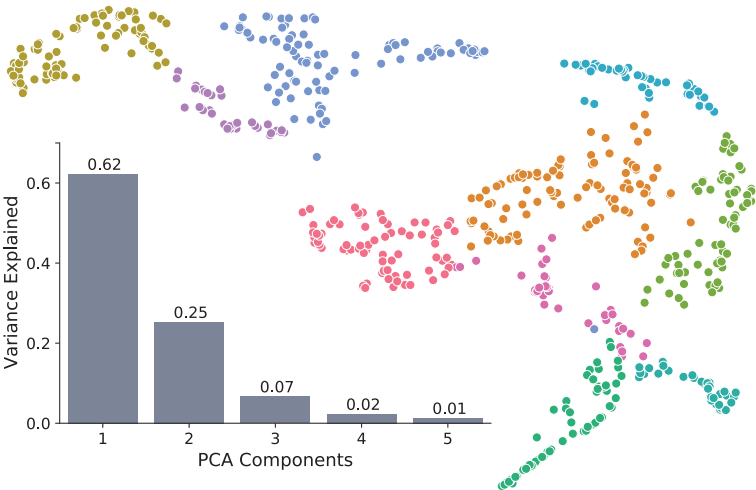

Supplement: supp [file elife-67490-supp-v1.zip]

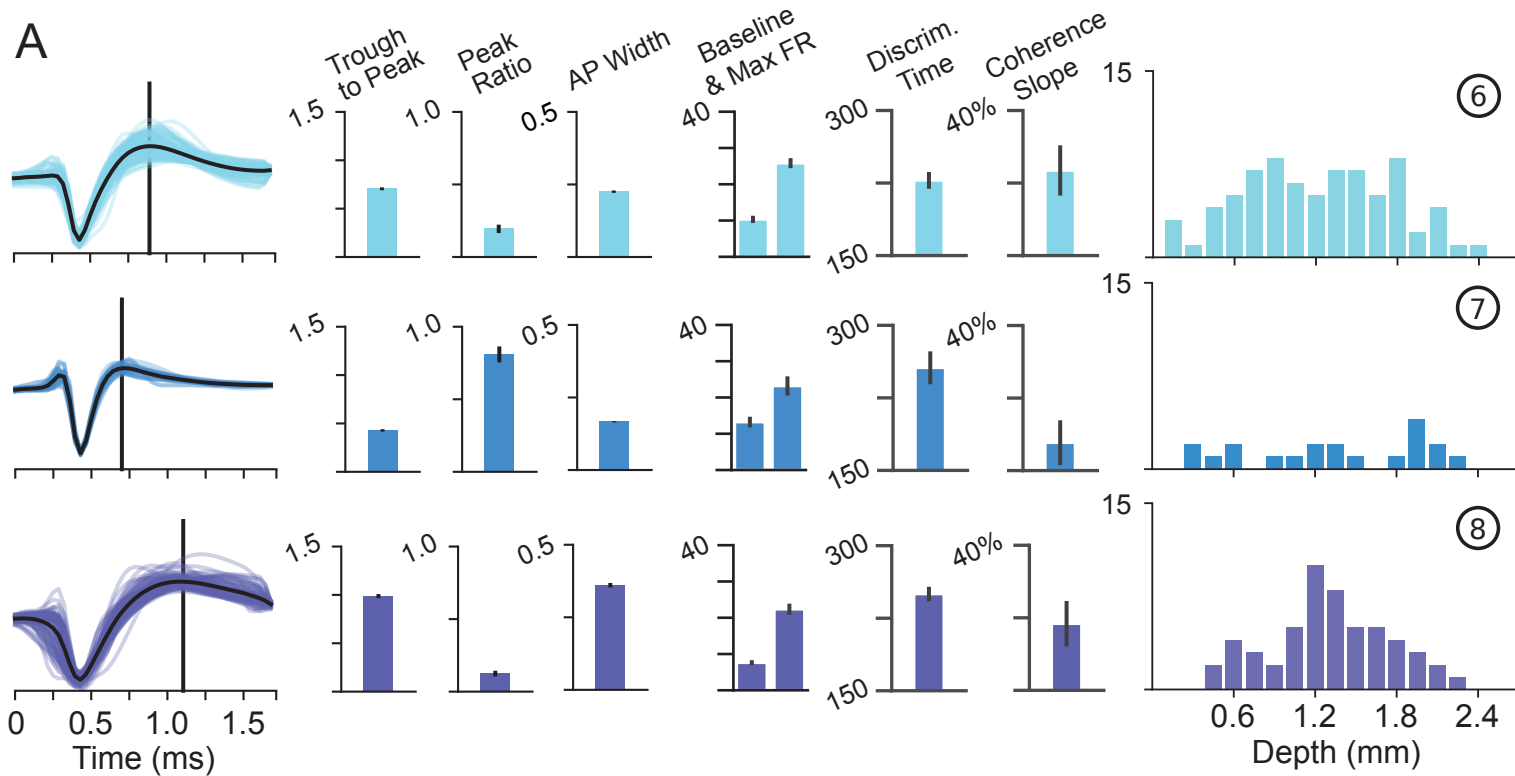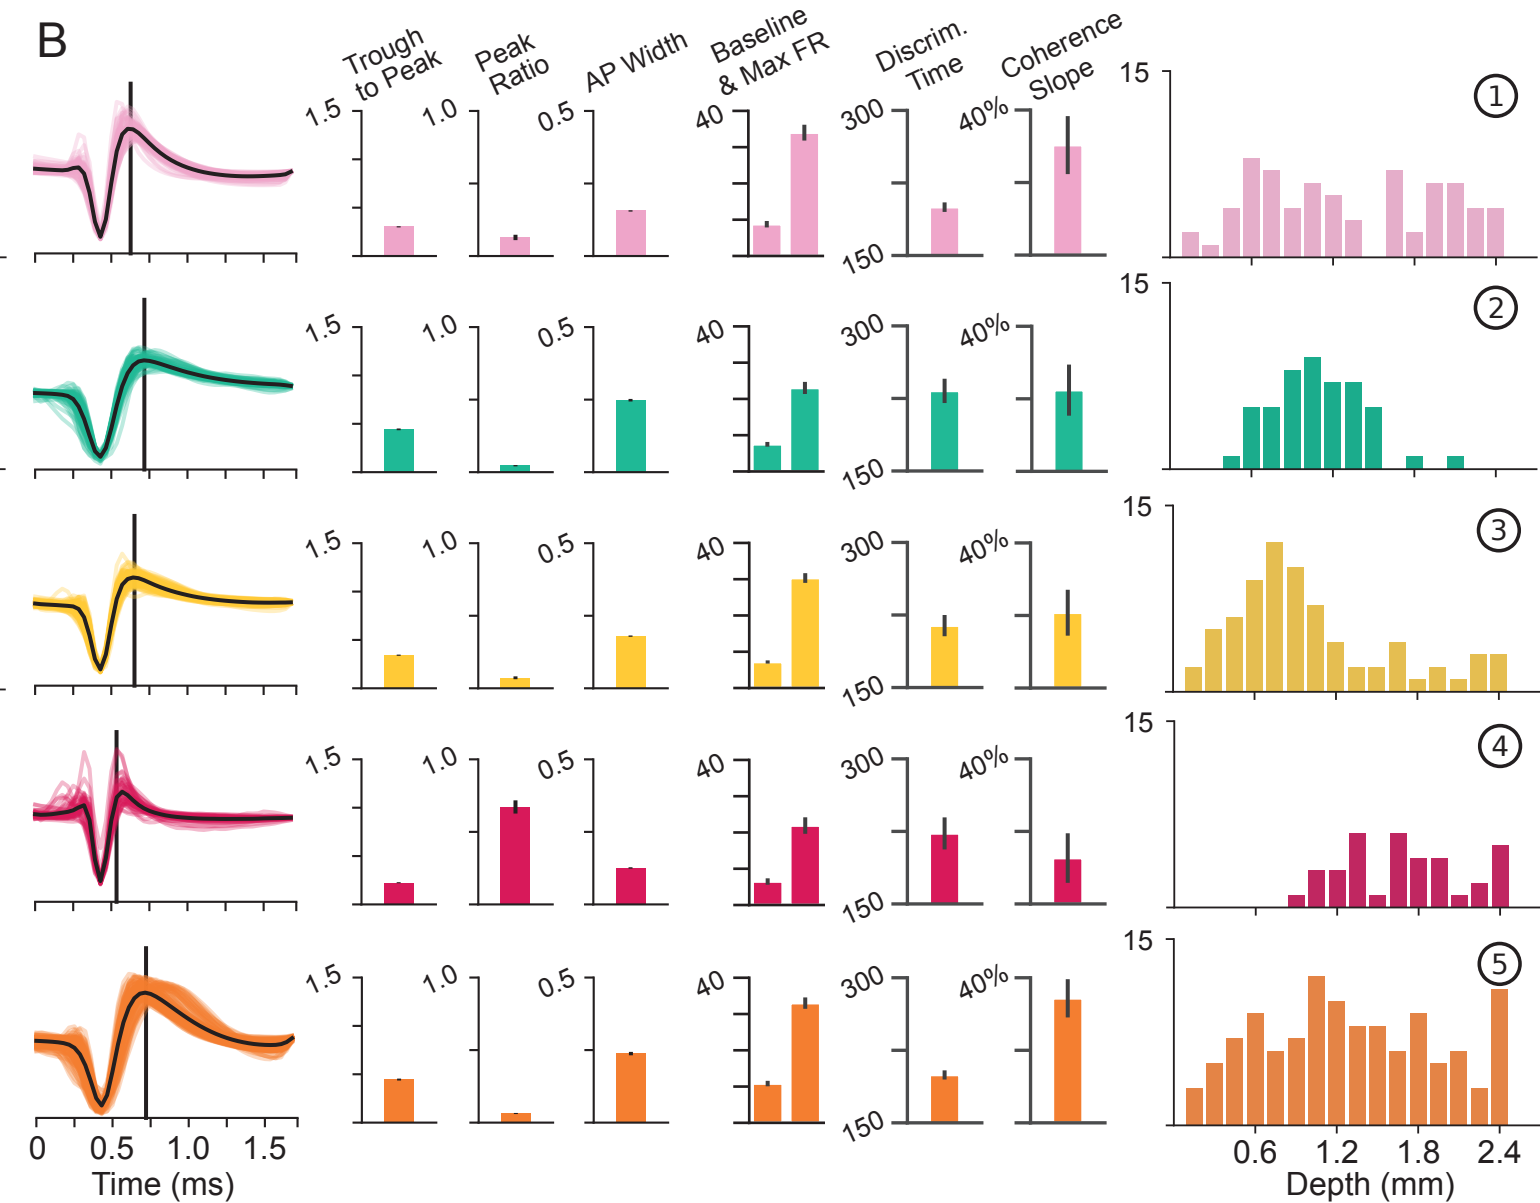

Supplement: supp [file elife-67490-supp-v1.zip]

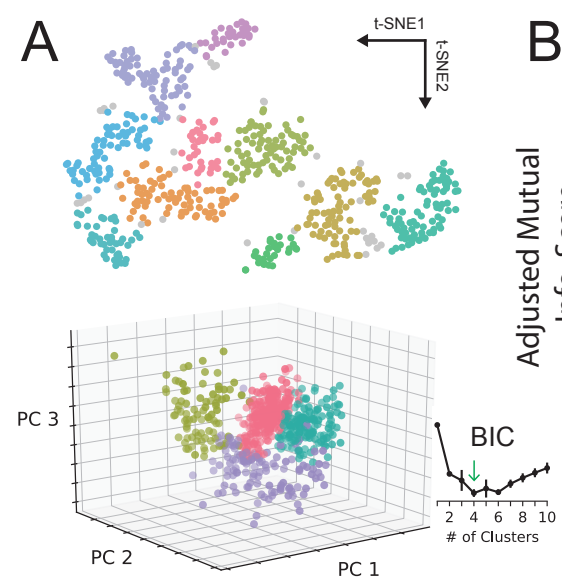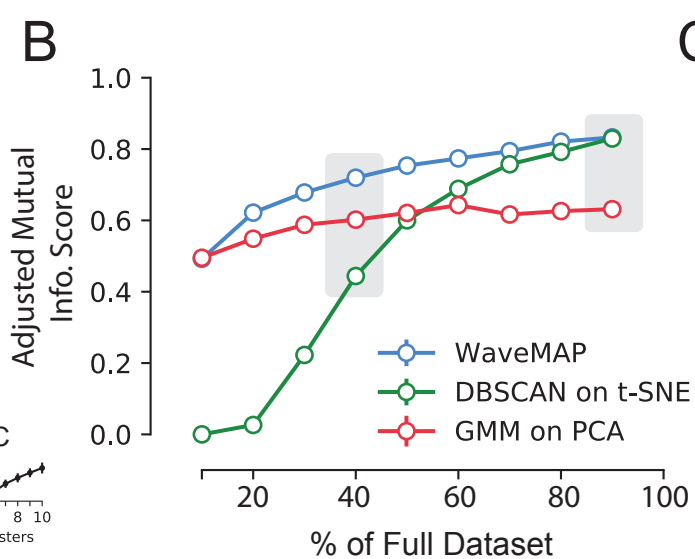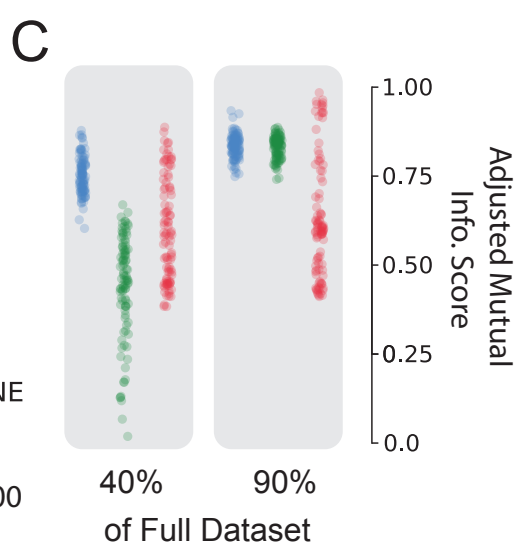

Supplement: supp [file elife-67490-supp-v1.zip]
